# Supplementary material
Source: PubMed Central journal article supplement (PMC7059182)
Supplement: ja9b10061_si_001.pdf [file ja9b10061_si_001.pdf]

## Supporting Information to

# Competition between CO<sub>2</sub> reduction and hydrogen evolution on a gold electrode under well-defined mass transport conditions

Akansha Goyal; Giulia Marcandalli; Vladislav A. Mints; Marc T.M. Koper\*

Leiden Institute of Chemistry, Leiden University, PO Box 9502, 2300 RA Leiden, The Netherlands

\*email: [m.koper@chem.leidenuniv.nl](mailto:m.koper@chem.leidenuniv.nl)

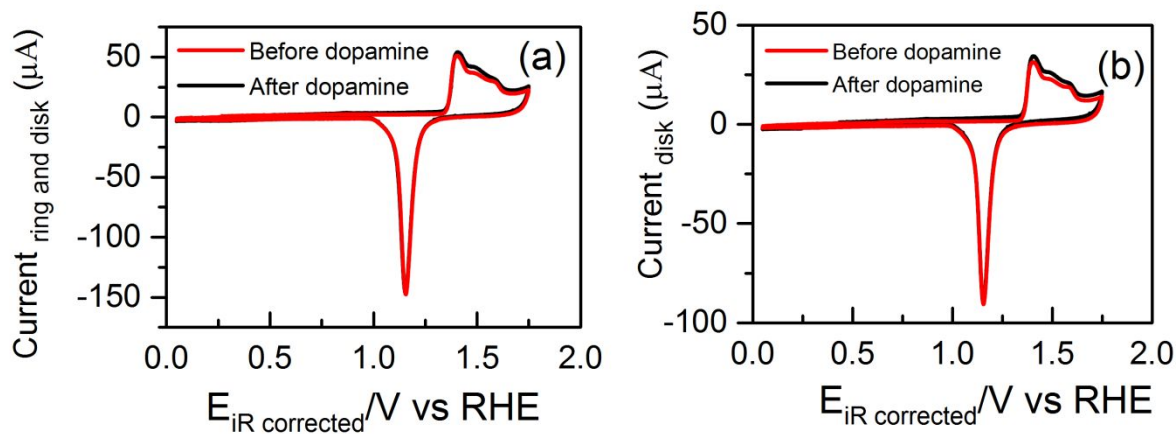

FigureS1 Characterization CV of (a) Ring and Disk and (b) Disk, in 0.1 M H<sub>2</sub>SO<sub>4</sub>, recorded at 50 mVs<sup>-1</sup>. Red: before dopamine coating. Black: after dopamine coating.

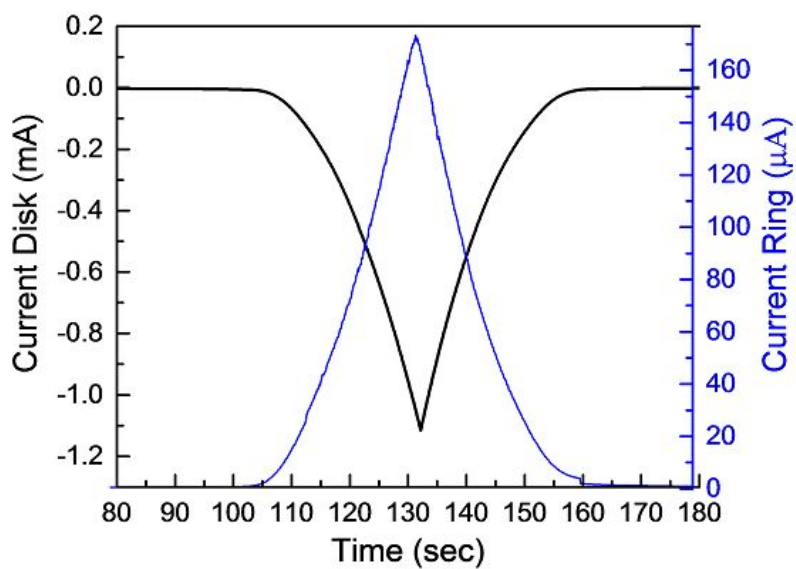

FigureS2 RRDE currents for the Au polycrystalline disk (black) and Au ring (blue) vs time, in  $\text{CO}_2$  sat.  $0.1 \text{ M NaHCO}_3$  (bulk  $\text{pH} = 6.8$ ), recorded at  $25 \text{ mVs}^{-1}$  at  $800 \text{ rpm}$ .

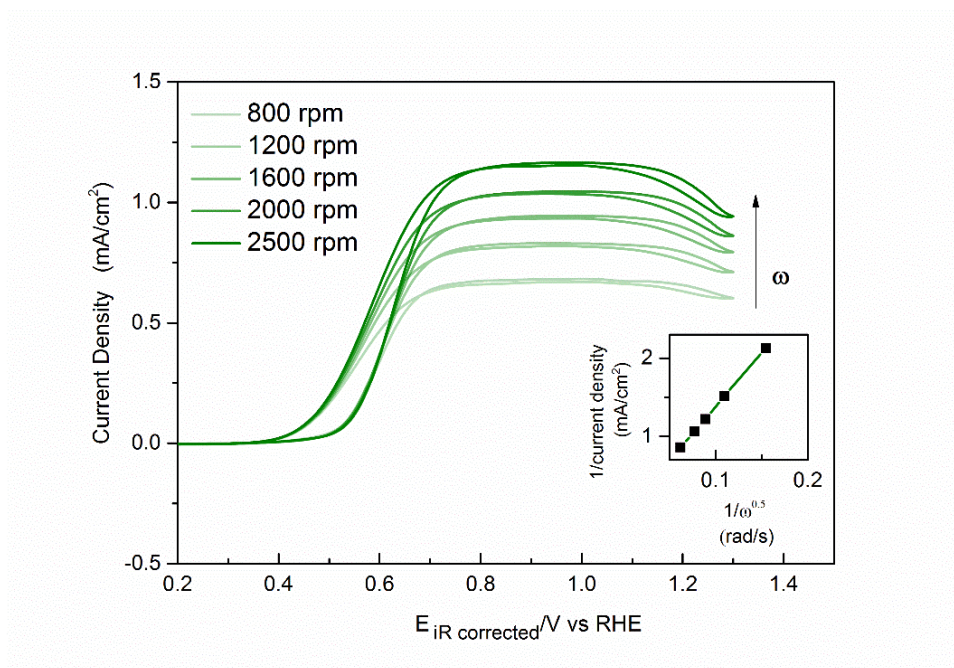

FigureS3  $\text{CO}$  oxidation CV on Au polycrystalline surface at different rotation rates in  $\text{CO}$  sat.  $0.1 \text{ M NaHCO}_3$  (bulk  $\text{pH} = 9$ ), recorded at  $25 \text{ mVs}^{-1}$  from  $0.2 \text{ V}$  to  $1.3 \text{ V}$  vs RHE. The direction of the arrow indicates increasing rotation rate. Inset shows the Koutecky-Levich analysis for the  $\text{CO}$  oxidation currents at  $1 \text{ V}$  (vs RHE), where the calculated intercept of the line is  $0.006$ .

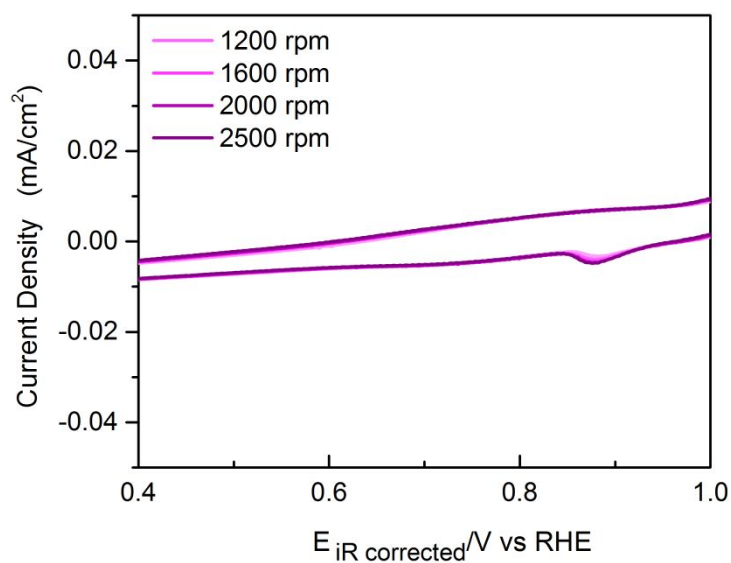

FigureS4 CV for Au polycrystalline surface in  $H_2$  sat.  $0.1\text{ M NaHCO}_3$  (bulk  $\text{pH} = 9$ ) in the potential window of CO oxidation recorded at  $25\text{ mVs}^{-1}$ , at different rotation speeds.

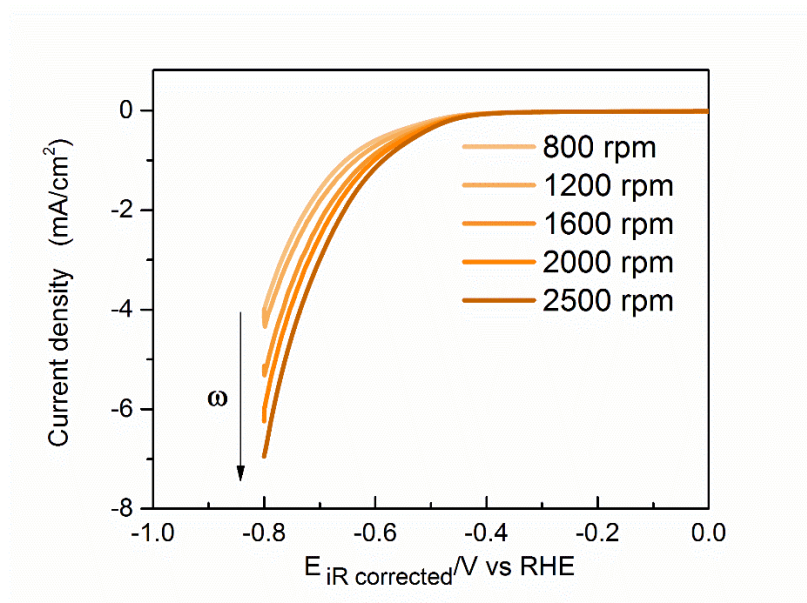

FigureS5 CVs obtained for HER at different rotation rates using the RDE on Au polycrystalline surface in Ar sat.  $0.5\text{ M NaHCO}_3$  at  $25\text{ mVs}^{-1}$ . The direction of the arrow indicates increasing rotation rate.

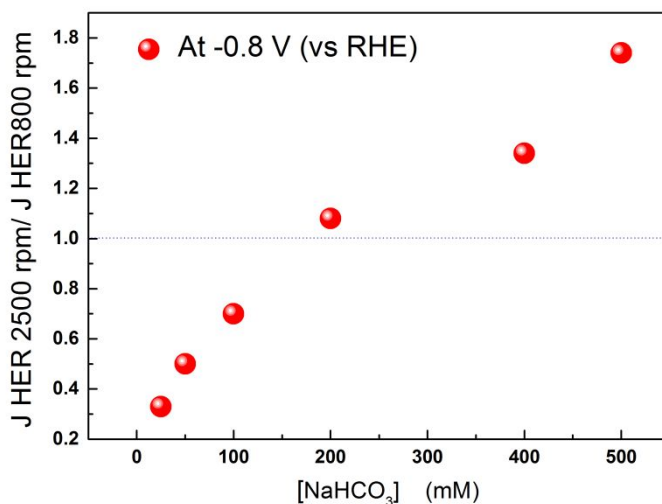

FigureS6 Ratio of HER current density at 2500 rpm and 800 rpm at -0.8 V (vs RHE) as a function of the sodium bicarbonate concentration in mM, obtained under Ar sat. conditions on Au polycrystalline surface using RDE. A ratio of less than 1 indicates that the water reduction is the dominant branch of HER and a ratio of greater than 1 indicates that bicarbonate mediated HER is the dominant branch.

| Rotation speed (rpm) | Diffusion layer thickness ( $\mu\text{m}$ ) | J limiting theoretical ( $\text{mA}/\text{cm}^2$ ) |
|----------------------|---------------------------------------------|----------------------------------------------------|
| 400                  | 2.7                                         | -36.6                                              |
| 800                  | 1.9                                         | -51.8                                              |
| 1200                 | 1.6                                         | -63.4                                              |
| 1600                 | 1.4                                         | -73.2                                              |
| 2000                 | 1.3                                         | -81.9                                              |
| 2500                 | 1.1                                         | -91.5                                              |

TableS1 Theoretically calculated diffusion limited currents for the two electron  $\text{CO}_2$  reduction in the RDE set-up at different rotation rates, by using the Levich equation and Fick's first law of diffusion. Where diffusion coefficient of  $\text{CO}_2$  is taken to be  $1.6 \times 10^{-5} \text{ cm}^2/\text{s}$ , the kinematic viscosity of water is taken to be  $8.9 \times 10^{-3} \text{ cm}^2/\text{s}$ , the Faraday's constant is taken to be  $96500 \text{ C/mol}$ , the number of electrons involved is taken to be 2 and the concentration of  $\text{CO}_2$  in the bulk is taken to be  $33 \text{ mM}$ .<sup>1-2</sup>

## REFERENCES

1. Bard, A. J.; Faulkner, L. R., *Electrochemical methods : fundamentals and applications* Wiley: New York, **1980**.
  2. Ooka, H.; Figueiredo, M. C.; Koper, M. T. M., Competition between Hydrogen Evolution and Carbon Dioxide Reduction on Copper Electrodes in Mildly Acidic Media. *Langmuir* **2017**, *33* (37), 9307-9313.
-
